# Supplementary material for: First principles approach and experimental exploration of a new double perovskite phase Sr2(In0.33 Sn0.33Sb0.33)2O6: evaluation of structural, optical, and dielectric properties
Source: Royal Society of Chemistry journal article supplement (doi:10.1039/d4ra05308g), 2024-01-01
Supplement: d4ra05308g8.pdf [file d4ra05308g8.pdf]

**Table S1: Lattice parameters of the different calculated models compared to those of experimental data (The relative energetic stabilities of these various models are presented).**

|            |                         | cell parameters                   |         |                |        |                |        |                |         |  |        |
|------------|-------------------------|-----------------------------------|---------|----------------|--------|----------------|--------|----------------|---------|--|--------|
| Models     | Stacking (Wyckoff site) | Energy (meV/f.u)                  | a       | $\Delta a/a$ % | b      | $\Delta b/b$ % | c      | $\Delta c/c$ % | $\beta$ |  |        |
| Exp. 1     |                         |                                   | 5.4502  |                | 5.7206 |                | 9.7006 |                |         |  | 123.53 |
| O6 (P21/c) | Model 1                 | Sn/In (2d) Sn/Sb (2a)             | 0.00    | 5.7900         | 6.2    | 5.8235         | 1.8    | 10.0500        | 3.6     |  | 125.3  |
|            | Model 2                 | Sn/In (2d) Sn/Sb (2a)             | 4       | 5.7835         | 6.1    | 5.8263         | 1.9    | 10.0443        | 3.5     |  | 125.2  |
|            | Model3                  | Sn/In (2d) Sn/Sb (2a)             | 0.3     | 5.7838         | 6.1    | 5.8262         | 1.8    | 10.0446        | 3.5     |  | 125.2  |
| Exp. 2     |                         |                                   | 17.1850 |                | 5.6955 |                | 9.9037 |                |         |  | 125.2  |
| O9 (P21/c) | Model 4                 | In(2a) In(2d) Sn/Sb(4e) Sn/Sb(4e) | 417     | 17.3758        | 1.1    | 5.7719         | 1.3    | 8.1321         | 17.9    |  | 125.5  |
|            | Model 5                 | In(2a) In(2d) Sn/Sb(4e) Sn/Sb(4e) | 199     | 17.2984        | 0.7    | 5.7796         | 1.5    | 8.1318         | 17.9    |  | 125.5  |
|            | Model 6                 | In/Sn(4e) Sb/Sn(4e) In(2a) Sb(2d) | 95      | 17.2691        | 0.5    | 5.7833         | 1.5    | 9.9396         | 0.4     |  | 125.4  |
|            | Model 7                 | In/Sn(4e) Sb/Sn(4e) Sb(2a) In(2d) | 186     | 17.2984        | 0.7    | 5.7796         | 1.5    | 8.1318         | 17.9    |  | 125.3  |
|            | Model 8                 | In(4e) Sb(4e) Sn(2a) Sn(2d)       | 94      | 17.2815        | 0.6    | 5.7762         | 1.4    | 9.9534         | 0.5     |  | 125.4  |

**Table S2: EDX analysis showing the atomic percent of all evaluated elements of the  $\text{Sr}_2(\text{Sn}_{0.33}\text{Sb}_{0.33}\text{In}_{0.33})_2\text{O}_6$  ceramic**

|                          | Sr   | Sn    | In    | Sb    | O    | C   |
|--------------------------|------|-------|-------|-------|------|-----|
| Nominal composition      | 20   | 6.666 | 6.666 | 6.666 | 60   |     |
| Experimental composition | 16.1 | 8.1   | 8.3   | 8.3   | 54.8 | 4.5 |
| Absolute error (%)       | 0.3  | 1.2   | 0.8   | 1.0   | 1.5  | 0.6 |

**Table S3 Fitting parameters of the complex impedance plots at various temperatures for  $\text{Sr}_2(\text{Sn}_{0.33}\text{Sb}_{0.33}\text{In}_{0.33})_2\text{O}_6$  ceramic**

| T(K) | R( $\Omega$ )        | C(F)                  | Q(F)                  | $\alpha$ |
|------|----------------------|-----------------------|-----------------------|----------|
| 573  | 2.0733E <sup>7</sup> | 4.038E <sup>-11</sup> | 5.000E <sup>-10</sup> | 0.63837  |
| 593  | 1.0958E <sup>7</sup> | 4.029E <sup>-11</sup> | 5.990E <sup>-10</sup> | 0.64186  |
| 613  | 6.0656E <sup>6</sup> | 4.022E <sup>-11</sup> | 7.010E <sup>-10</sup> | 0.64558  |
| 633  | 3.545E <sup>6</sup>  | 4.038E <sup>-11</sup> | 9.178E <sup>-10</sup> | 0.63694  |
| 653  | 2.2286E <sup>6</sup> | 4.030E <sup>-11</sup> | 1.160E <sup>-9</sup>  | 0.63232  |
| 673  | 1.2354E <sup>6</sup> | 4.509E <sup>-11</sup> | 5.460E <sup>-9</sup>  | 0.502    |
