# Supplementary figures and images for: First principles approach and experimental exploration of a new double perovskite phase Sr2(In0.33 Sn0.33Sb0.33)2O6: evaluation of structural, optical, and dielectric properties
Source: Royal Society of Chemistry journal article supplement (doi:10.1039/d4ra05308g), 2024-01-01

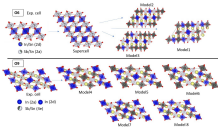

Supplement: d4ra05308g2.pdf [file d4ra05308g2.pdf]

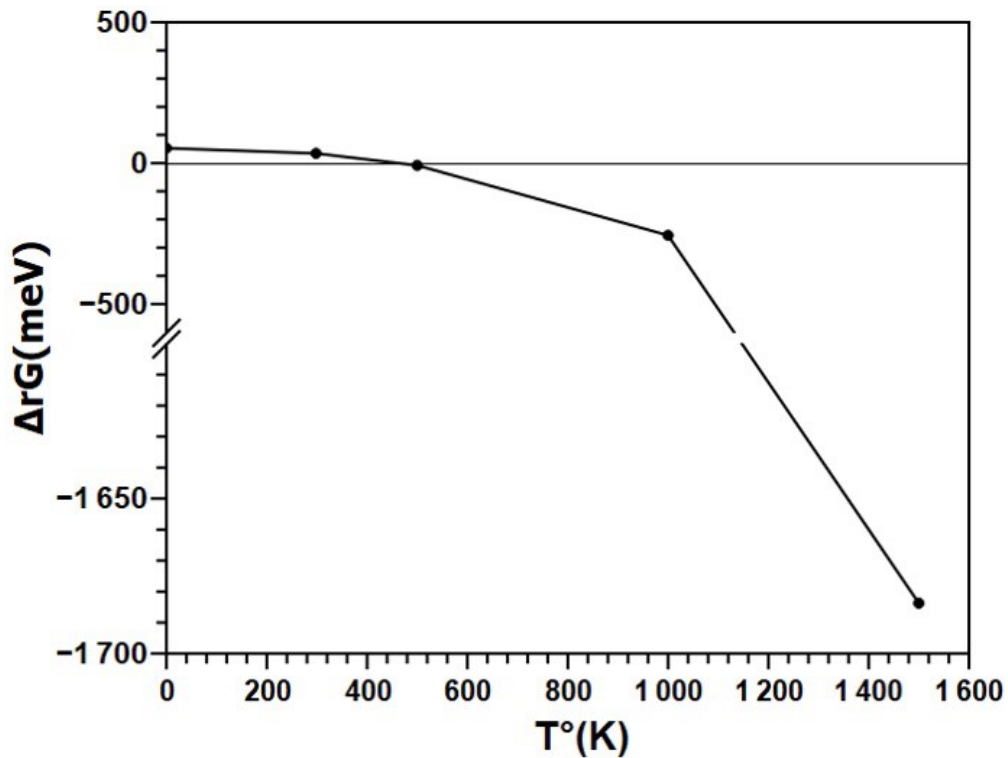

Supplement: d4ra05308g3.pdf [file d4ra05308g3.pdf]

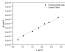

Supplement: d4ra05308g4.pdf [file d4ra05308g4.pdf]

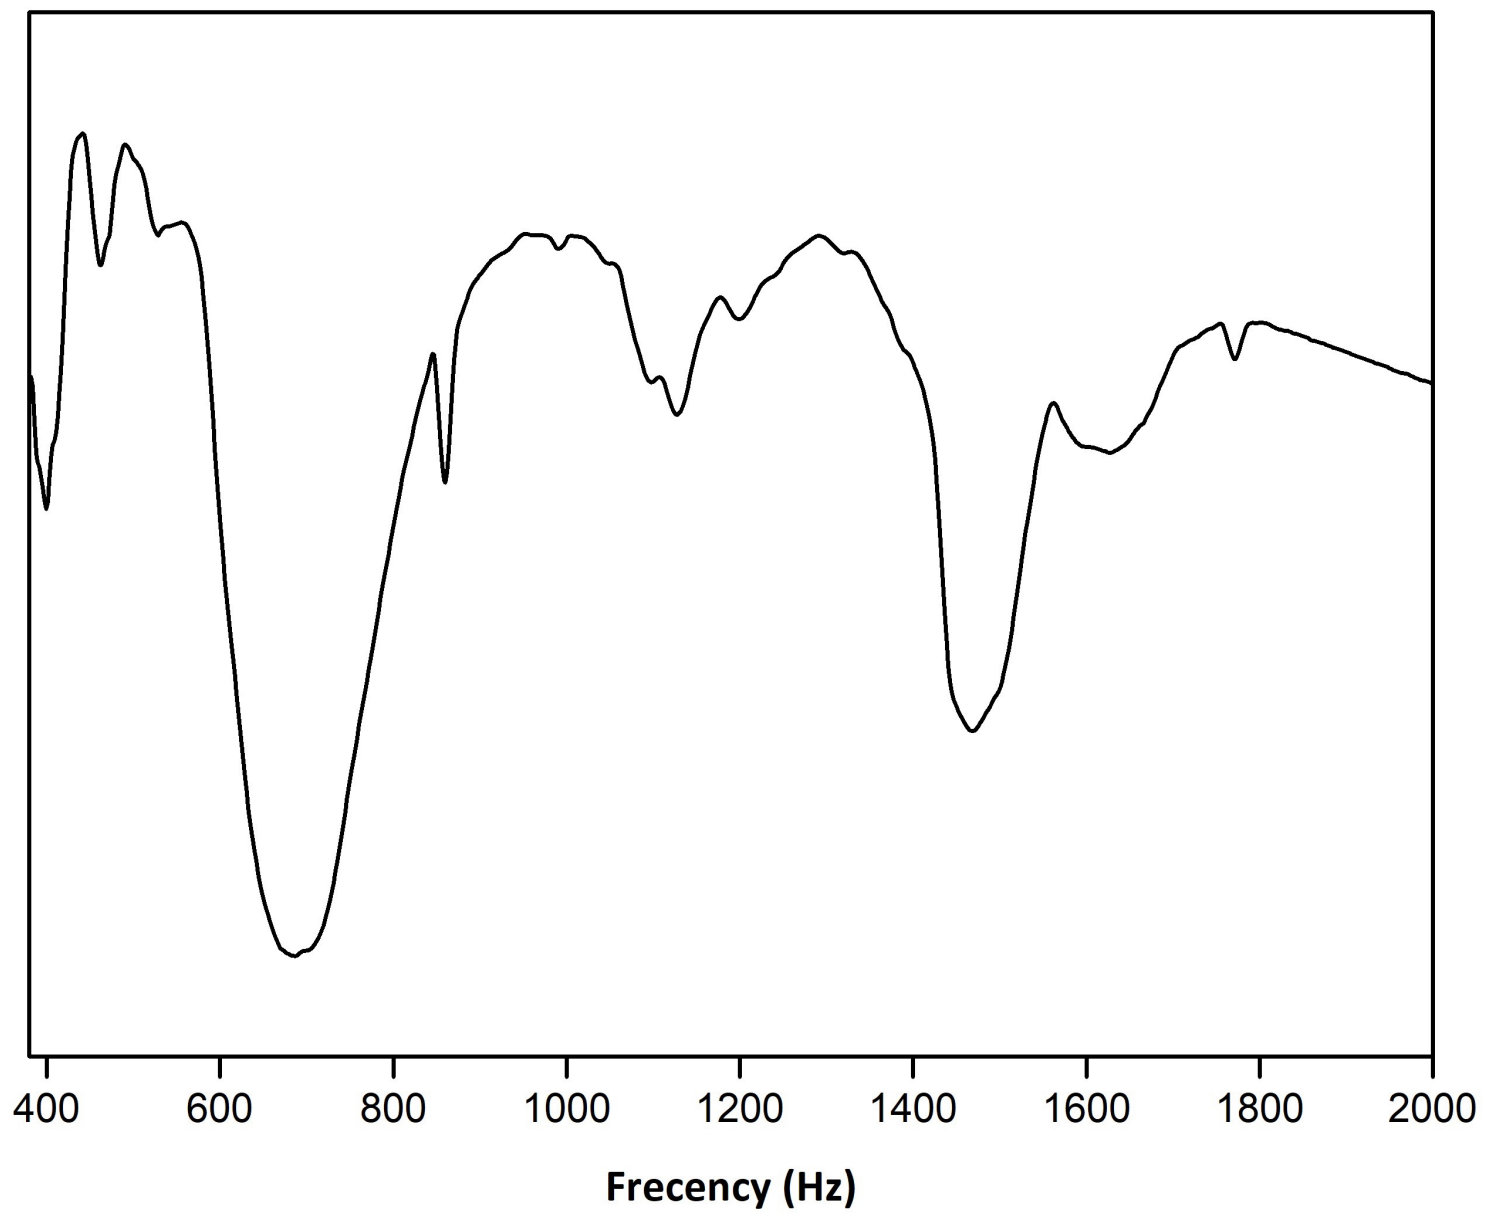

Supplement: d4ra05308g5.pdf [file d4ra05308g5.pdf]

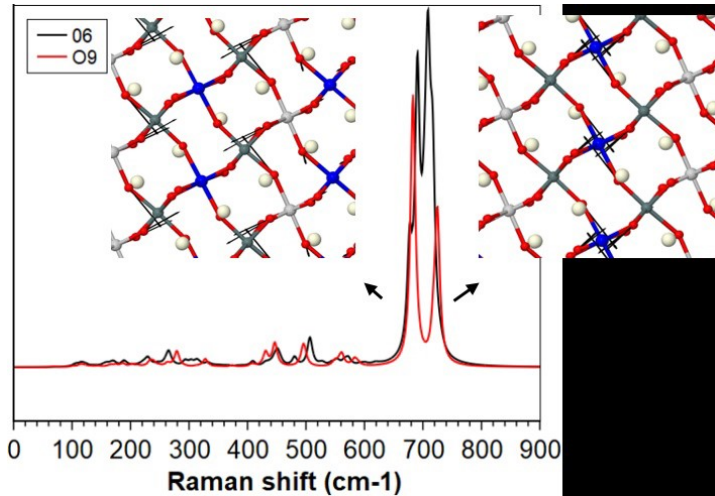

Supplement: d4ra05308g6.pdf [file d4ra05308g6.pdf]
